# Supplementary material for: The Rapid Evolution of Resistance to Vip3Aa Insecticidal Protein in Mythimna separata (Walker) Is Not Related to Altered Binding to Midgut Receptors
Source: MDPI journal article supplement (doi:10.3390/toxins13050364), 2021-05-20
Supplement: s1 [file s1]

# Supplementary Materials: The Rapid Evolution of Resistance to Vip3Aa Insecticidal Protein in *Mythimna separata* (Walker) is not Related to Altered Binding to Midgut Receptors

Yudong Quan, Jing Yang, Yueqin Wang, Patricia Hernández-Martínez, Juan Ferré and Kanglai He

**Table S1.** The susceptibility of collected *Mythimna separata* against Vip3A and Cry1 toxins.

| Toxins | Methods <sup>1</sup> | LC <sub>50</sub> (95% FL) | LC <sub>95</sub> (95% FL) | Slope ± SE  | χ <sup>2</sup> |
|--------|----------------------|---------------------------|---------------------------|-------------|----------------|
| Vip3Aa | μg/g                 | 1.64 (0.55, 3.53)         | 35 (17, 148)              | 1.24 ± 0.13 | 10.0           |
|        | μg/cm <sup>2</sup>   | 0.86 (0.29, 1.86)         | 185 (90, 779)             | 1.24 ± 0.15 | 11.1           |
| Cry1Ab | μg/g                 | 6.54 (2.44, 12.00)        | 289 (104, 3002)           | 0.96 ± 0.12 | 6.6            |
|        | μg/cm <sup>2</sup>   | 0.16 (0.06, 0.29)         | 6.89 (2.49, 71.5)         | 0.60 ± 0.14 | 6.6            |
| Cry1F  | μg/g                 | 26.1 (17.6, 37.5)         | 4700 (2043, 15,403)       | 0.20 ± 0.03 | 12.5           |
|        | μg/cm <sup>2</sup>   | 1.71 (1.16, 2.46)         | 308 (134, 1010)           | 0.73 ± 0.07 | 10.0           |

<sup>1</sup> Methods: “μg/g” (toxin/diet) was performed by directly mixing the toxin and the diet as described previously [36]; “μg/cm<sup>2</sup>” was obtained by the quantitative surface contamination assay [38].

**Table S2.** Response of *M. separata* to selection with Vip3Aa.

| Generation | LC <sub>50</sub> (95% FL)<br>μg/cm <sup>2</sup> | LC <sub>95</sub> (95% FL)<br>μg/cm <sup>2</sup> | RR <sub>50</sub> <sup>a</sup> | Slope ± SE  | χ <sup>2</sup> |
|------------|-------------------------------------------------|-------------------------------------------------|-------------------------------|-------------|----------------|
| Ms-S       | 0.86 (0.29, 1.86)                               | 185 (90, 779)                                   | /                             | 1.24 ± 0.15 | 11.1           |
| F1         | 26.8 (5.5, 84.7)                                | >4736                                           | 31                            | 0.73 ± 0.16 | 4.4            |
| F2         | 239 (106, 977)                                  | >100,000                                        | 278                           | 0.69 ± 0.11 | 17.9           |
| Ms-S       | 0.81 (0.45, 1.42)                               | 206 (76, 880)                                   | /                             | 0.68 ± 0.07 | 7.8            |
| F5         | 224.9 (86.4, 816.8)                             | >500,000                                        | 277                           | 0.48 ± 0.10 | 3.7            |
| F6         | >320                                            | /                                               | >400                          | /           | /              |
| F7         | >1052                                           | /                                               | >1200                         | /           | /              |
| Ms-S       | 0.55 (0.26, 1.14)                               | 213 (66, 850)                                   | /                             | 0.71 ± 0.07 | 7.8            |
| F9         | >1684                                           | /                                               | >3061                         | /           | /              |

**Table S3.** Response of *M. separata* to selection with Cry1Ab.

| Generation | LC <sub>50</sub> (95% FL)<br>µg/cm <sup>2</sup> | LC <sub>95</sub> (95% FL)<br>µg/cm <sup>2</sup> | RR <sub>50</sub> <sup>a</sup> | Slope ± SE  | χ <sup>2</sup> |
|------------|-------------------------------------------------|-------------------------------------------------|-------------------------------|-------------|----------------|
| Ms-S       | 0.16 (0.06, 0.29)                               | 6.89 (2.49, 71.5)                               | /                             | 0.60 ± 0.14 | 6.6            |
| F1         | 0.38 (0.17, 0.73)                               | 91 (19, 2954)                                   | 2.5                           | 0.69 ± 0.11 | 6.0            |
| F2         | 0.19 (0.11, 0.30)                               | 18.2 (7.9, 68.8)                                | 1.2                           | 0.83 ± 0.07 | 28.7           |
| Ms-S       | 0.21 (0.15, 0.29)                               | 3.25 (1.87, 7.78)                               | /                             | 1.38 ± 0.60 | 4.8            |
| F6         | 0.18 (0.12, 0.26)                               | 4.69 (2.49, 12.04)                              | 0.9                           | 1.16 ± 0.13 | 0.6            |
| Ms-S       | 0.11 (0.03, 0.25)                               | 14.2 (4.04, 178)                                | /                             | 0.78 ± 0.12 | 13.0           |
| F7         | 0.28 (0.18, 0.42)                               | 16.6 (7.43, 54.0)                               | 2.5                           | 0.93 ± 0.09 | 7.4            |
| Ms-S       | 0.14 (0.08, 0.23)                               | 6.65 (3.04, 20.8)                               | /                             | 0.99 ± 0.11 | 5.9            |
| F8         | 0.39 (0.20, 0.60)                               | 49 (15, 139)                                    | 2.7                           | 0.76 ± 0.08 | 6.9            |

**Table S4.** Response of *M. separata* to selection with Cry1F.

| Generation | LC <sub>50</sub> (95% FL)<br>µg/cm <sup>2</sup> | LC <sub>95</sub> (95% FL)<br>µg/cm <sup>2</sup> | RR <sub>50</sub> <sup>a</sup> | Slope ± SE  | χ <sup>2</sup> |
|------------|-------------------------------------------------|-------------------------------------------------|-------------------------------|-------------|----------------|
| Ms-S       | 1.71 (1.16, 2.46)                               | 308 (134, 1010)                                 | /                             | 0.73 ± 0.07 | 10.0           |
| F2         | 2.06 (0.66, 4.64)                               | 236 (58, 6240)                                  | 1.2                           | 0.80 ± 0.11 | 9.9            |
| F4         | 5.63 (3.13, 12.8)                               | 937 (174, 38,381)                               | 3.3                           | 0.74 ± 0.14 | 6.8            |
| Ms-S       | 1.45 (0.32, 3.67)                               | 62 (158, 9022)                                  | /                             | 0.63 ± 0.12 | 9.1            |
| F7         | 10.6 (4.4, 18.3)                                | 435 (160, 4375)                                 | 7.3                           | 1.02 ± 0.22 | 0.6            |
| F8         | 2.99 (1.82, 4.77)                               | 134 (61, 440)                                   | 2.1                           | 0.99 ± 0.10 | 10.6           |
| Ms-S       | 1.73 (0.70, 4.25)                               | 271 (55, 8540)                                  | /                             | 0.75 ± 0.10 | 13.9           |
| F9         | 2.60 (1.77, 3.69)                               | 60 (35, 125)                                    | 1.5                           | 1.29 ± 0.12 | 5.1            |

<sup>a</sup> RR<sub>50</sub> = Ms-R LC<sub>50</sub>/Ms-S LC<sub>50</sub>.

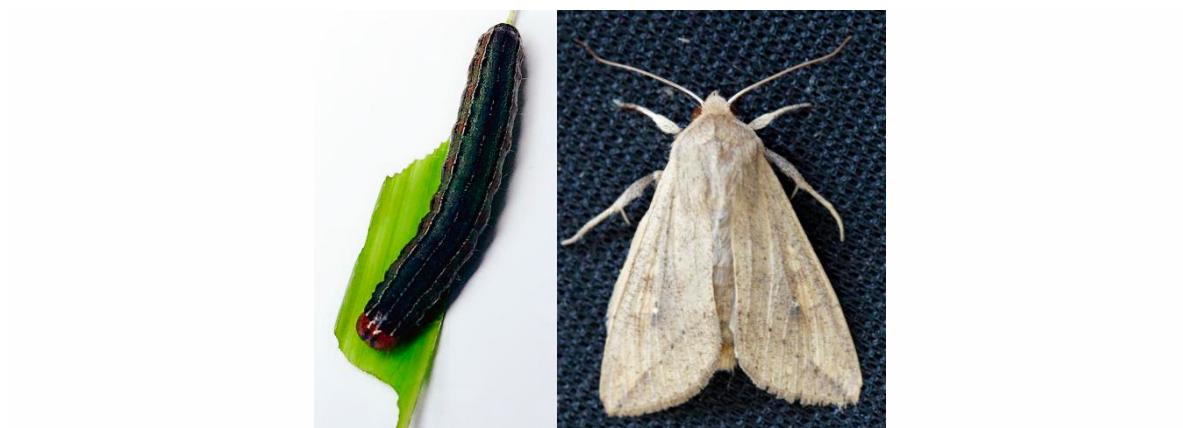

**Figure S1.** *Mythimna separata* larvae and adult.
